# Supplementary material for: A novel phytolectin purified from Eucalyptus vicina: properties and immunomodulatory activity
Source: Research Square preprint supplement (doi:10.21203/rs.3.rs-6311146/v1), 2025-04-24
Supplement: Supplementary file 1 [file 9aacc3248ead76e90aea063f.docx]

***The Protein Journal***

**A novel phytolectin purified from *Eucalyptus vicina*: properties and immunomodulatory activity**

Sana Boufeker1*. Ahlem Bahi1. Imene Torche1. Yacer Boudersa2. Ali Shaikh-Ibrahim4. Monna Taki Ellh Bousaoula1. Sondos Hejazi3*

1 Laboratory of Microbiological Engineering and Applications, UBM Constantine1, Algeria

2 Laboratory of Genetic, Biochemistry and Plants Biotechnology, UBM Constantine1, Algeria.

3 Dipartimento di Agraria, University of Naples “Federico II”, Parco Gussone, I-80055 Portici, Italy

4 Institute of Biosciences and BioResources, National Research Council of Italy, Naples.

Sana Boufeker

- [sana.boufeker@doc.umc.edu.dz](mailto:sana.boufeker@doc.umc.edu.dz), ORCID: 0000-0002-7177-4906

Sondos Hejazi

- [sondosmohammadhasan.hejazi@unina.it](mailto:sondosmohammadhasan.hejazi@unina.it), ORCID:0000-0002-2237-9467

**Supplementary material**

The DNA sequence obtained in this study and used in NCBI blastn database >2304978_E7_A1+49137_ITS_pl+ITSp5fwd

GGGGNAAGGTTTCGTAAGGTGAACCTGCGGAAGGATCATTGTCGAATCCTGCCCAGCAGAATGACCAGAGAACCGGTAACAAACTCAACGGGGACGGCGGGCTCAGCCCGACGTCCCTCTCGACGCCGAGGATCGGGGCTCGGGCACCTCAGGGCGCTCGGCCTTTGTCCTCGGCGGCGCAACGAACCCCGGCGCGGAATGCGCCAAGGAACTTTAACAAGAGTGCGATGCTCCCGCCGCCCCATACACGGTGCGCGCGCGGGATGCCATGCAATCTCATATTAGTCATAACGACTCTCGGCAACGGATATCTCGGCTCTCGCATCGATGAAGAACGTAGCGAACTGCGATACTTGGTGTGAATTGCAGAATCCCGTGAACCATCGAGTCTTTGAACGCAAGTTGCGCCCGAAACCTTTGGTCGAGGGCACGTTTGCCTGGGTGTCACACATGGCGTTGCCCCCAATCCCCTCCGCCCTTTGAACGGGGCGAGCGGGACTCGGGCGCGTACGATGGCCTCCCGCGACGACCACGTCCCGGTTGGCCCAAAATCGAGCGTCGGAGCGATCAGCACCACGACATTCGGTGGTTGATTAGACCCCAATGATCAATGTCGCGCGTGCCGCTCATCGCACGCTCCGCGAATCTGCTCCTTACCAACGCGACCCCAGGTCAAGCGGGGCTACCCGCTGAGTTTAAGCATATCATTAAGCGGATAGACCAGCTTGTCTGTTATCGAGTTTTTTGTTGAGTTTCGCGGAGCGATCTATTAGTGGCACGCACGATTCGTCNTTGTTGTTGNACATTCTCTTT


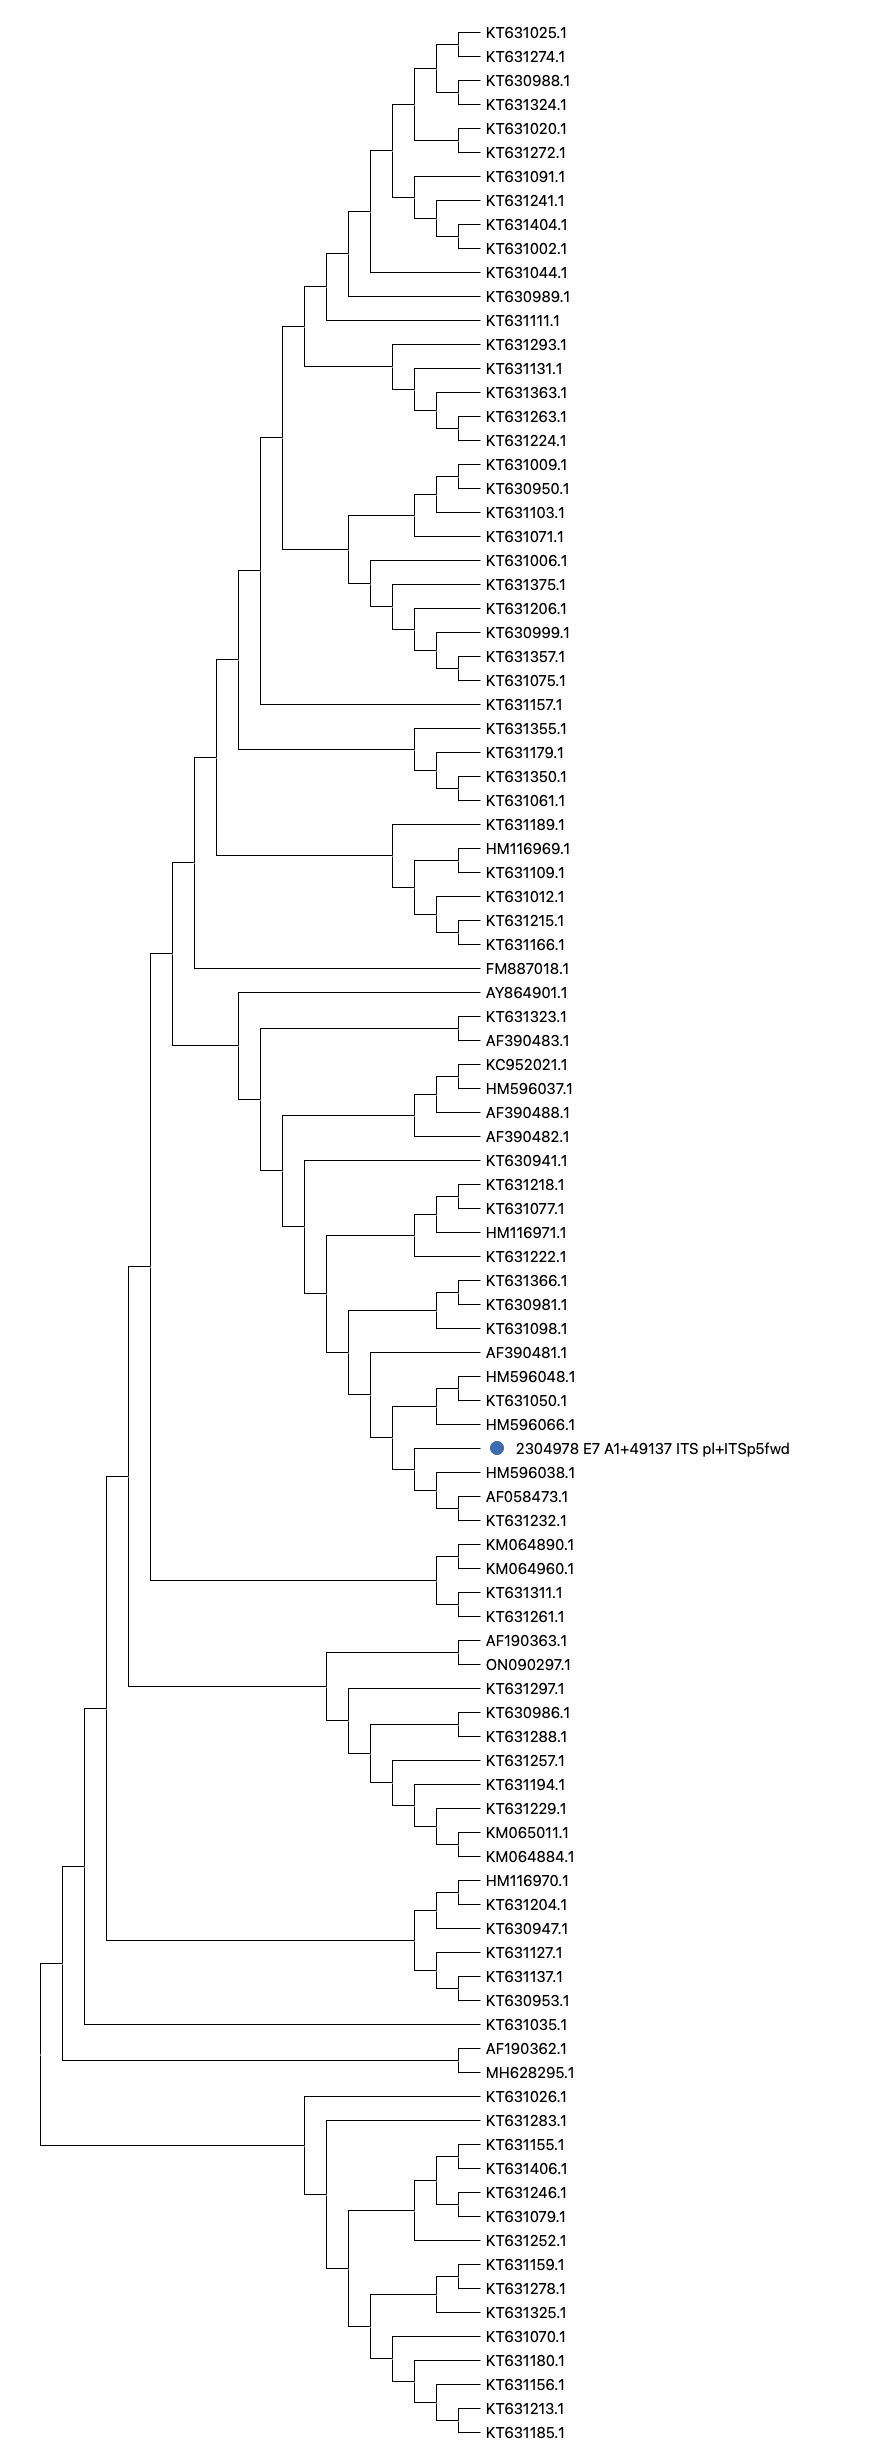


Fig.S1. Maximum likelihood phylogenetic tree of *Eucalyptus vicina* based on ITS sequence analysis, with the sequence from this study highlighted by a blue dot.
